# Supplementary material for: Copper(ii) complexes with 2-ethylpyridine and related hydroxyl pyridine derivatives: structural, spectroscopic, magnetic and anticancer in vitro studies
Source: Royal Society of Chemistry journal article supplement (doi:10.1039/d2ra05133h), 2022-01-01
Supplement: d2ra05133h1.pdf [file d2ra05133h1.pdf]

## Electronic Supplementary Information (ESI)

The copper(II) complexes with 2-ethylpyridine and related hydroxyl pyridine derivatives: the structural, spectroscopic, magnetic and anticancer *in vitro* studies.

Magdalena Malik<sup>1\*</sup>, Anna Świtlicka<sup>2</sup>, Alina Bieńko<sup>3</sup>, Urszula K. Komarnicka<sup>3</sup>,  
Dariusz C. Bieńko<sup>1</sup>, Sandra Kozieł<sup>3</sup>, Agnieszka Kyzioł<sup>4</sup>, Tomasz Mazur<sup>1</sup>,  
Barbara Machura<sup>2</sup>

<sup>1</sup> Faculty of Chemistry, Wrocław University of Science and Technology, Wybrzeże Wyspiańskiego 27, 50-370 Wrocław, Poland,

<sup>2</sup> Department of Crystallography, Institute of Chemistry, University of Silesia, Szkolna 9, 40-006 Katowice, Poland

<sup>3</sup> Faculty of Chemistry, University of Wrocław, F. Joliot-Curie 14, 50-383 Wrocław, Poland

<sup>4</sup> Faculty of Chemistry, Jagiellonian University, Gronostajowa 2, 30-387 Kraków, Poland

\* Corresponding author :

Magdalena Malik, Faculty of Chemistry, Wrocław University of Science and Technology, Wybrzeże Wyspiańskiego 27, 50-370 Wrocław, Poland,

Phone: +48 71 320 24 48; e-mail: magdalena.malik@pwr.edu.pl

## Contents:

## Figures:

**Fig S1.** The comparison of the FT-IR spectra of **1-4** in the 3600-500  $\text{cm}^{-1}$  spectral range.

**Fig S2.** The comparison of the Raman spectra of **1-4** in the 3200-100  $\text{cm}^{-1}$  spectral range.

**Fig. S3.** The FT-IR spectra for complexes **1-2** in MIR spectral region; \*-complex in DMSO solution.

**Fig. S4.** The FT-IR spectra for complexes **1-2** in FIR spectral region; \*-complex in DMSO solution.

**Fig. S5.** The FT-IR spectra for complex **3** in MIR spectral region; \*-complex in DMSO solution.

**Fig. S6.** The FT-IR spectra for complex **3** in FIR spectral region; \*-complex in DMSO solution.

**Fig. S7.** The FT-IR spectra for complex **4** in MIR spectral region; \*-complex in DMSO solution.

**Fig. S8.** The FT-IR spectra for complex **4** in FIR spectral region; \*-complex in DMSO solution.

**Fig. S9.** UV-Vis spectra with inserted of d-d transition of **1-4** in DMSO/H<sub>2</sub>O (9:1, v/v).

**Fig S10.** Thermogravimetric, TG (black) and differential thermal analysis(DTG, red) curves of complexes **1-4**.

**Fig S11.** Spin density isosurfaces (0.0075 a. u.) for high spin states of the 2–3 compounds, respectively (calculated with the hybrid B3LYP-D3 functional).

## Tables:

**Table S1.** Crystal data and structure refinement for **1-4**.

**Table S2.** Selected bond lengths (Å) and angles (deg) for **2**.

**Table S3.** The experimental and calculated vibrational frequencies of copper(II) complexes. B3LYP-D3/def2-TZVP level of theory was applied, the calculated frequencies are left unscaled; only selected bands are discussed.

**Table S4.** Mulliken populations computed at the B3LYP-D3 theory level of 2-3 (selected atoms).

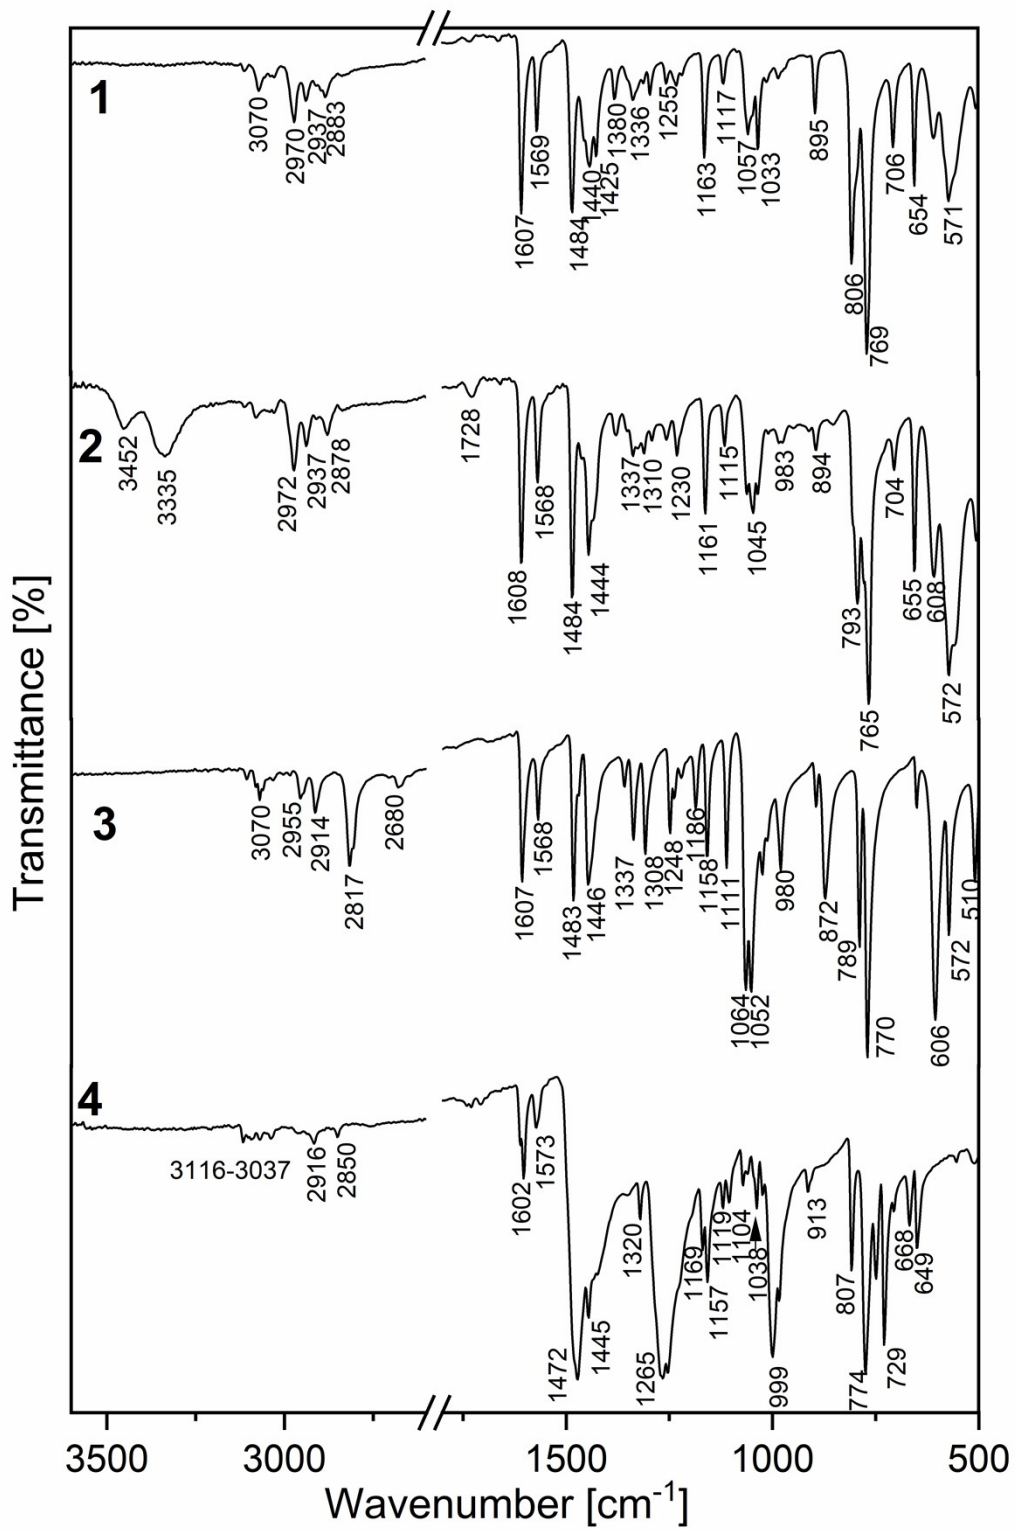

Fig. S1. The comparison of the FT-IR spectra of 1-4 in the 3600-500 cm<sup>-1</sup> spectral range.

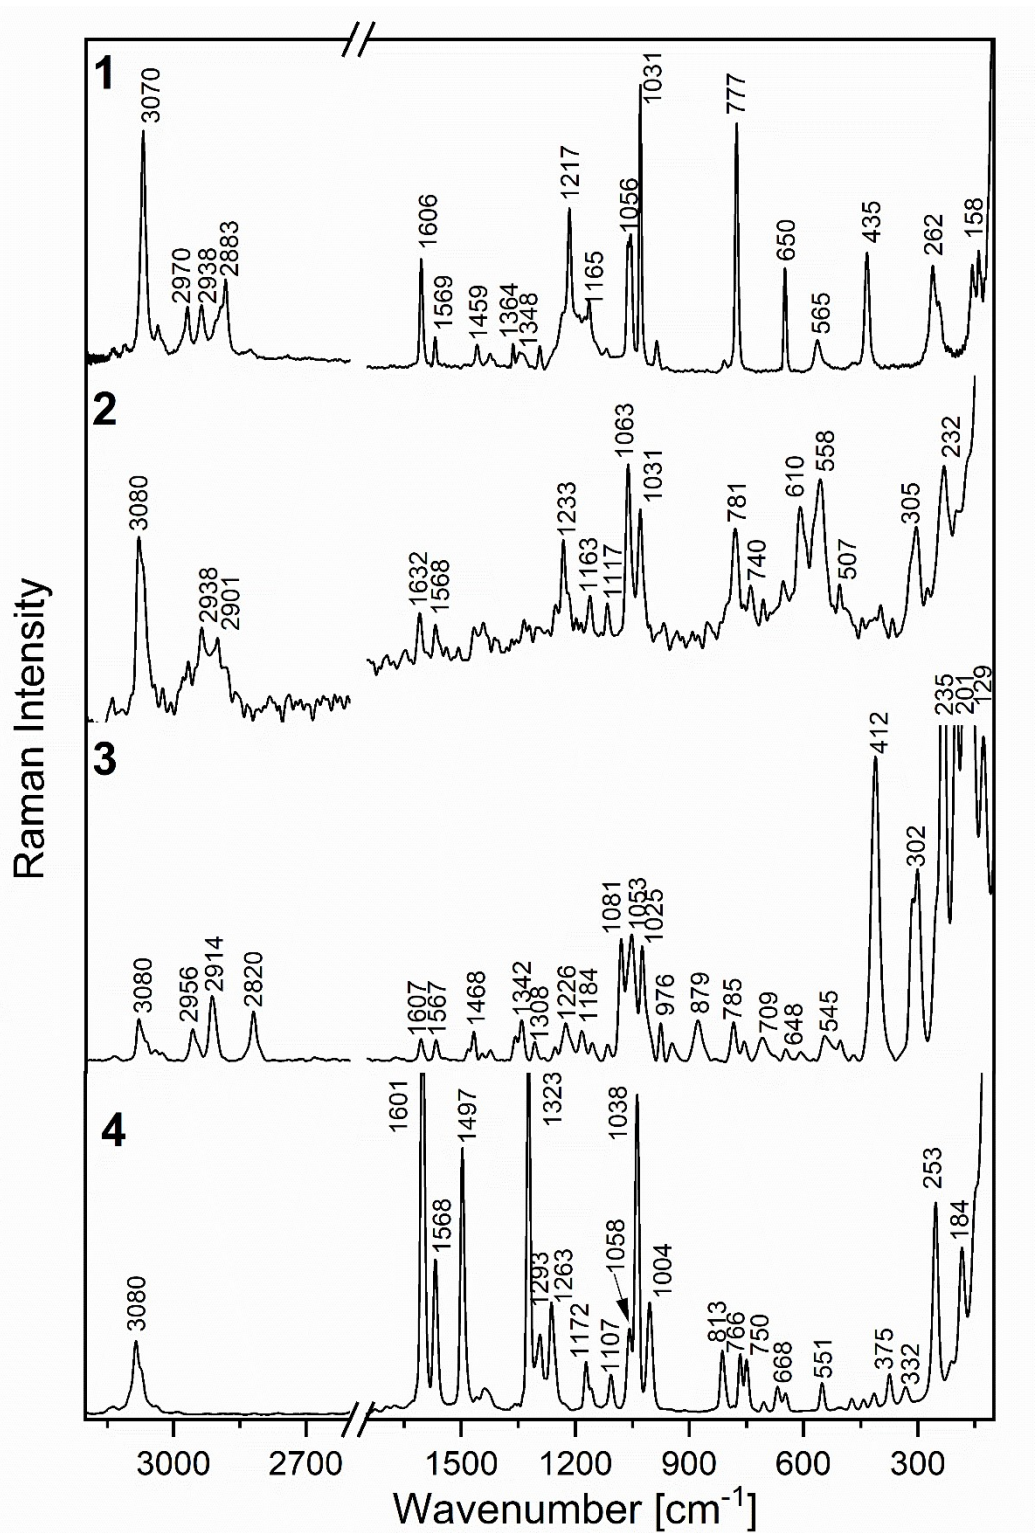

Fig. S2. The comparison of the Raman spectra of 1-4 in the 3200-100  $\text{cm}^{-1}$  spectral range.

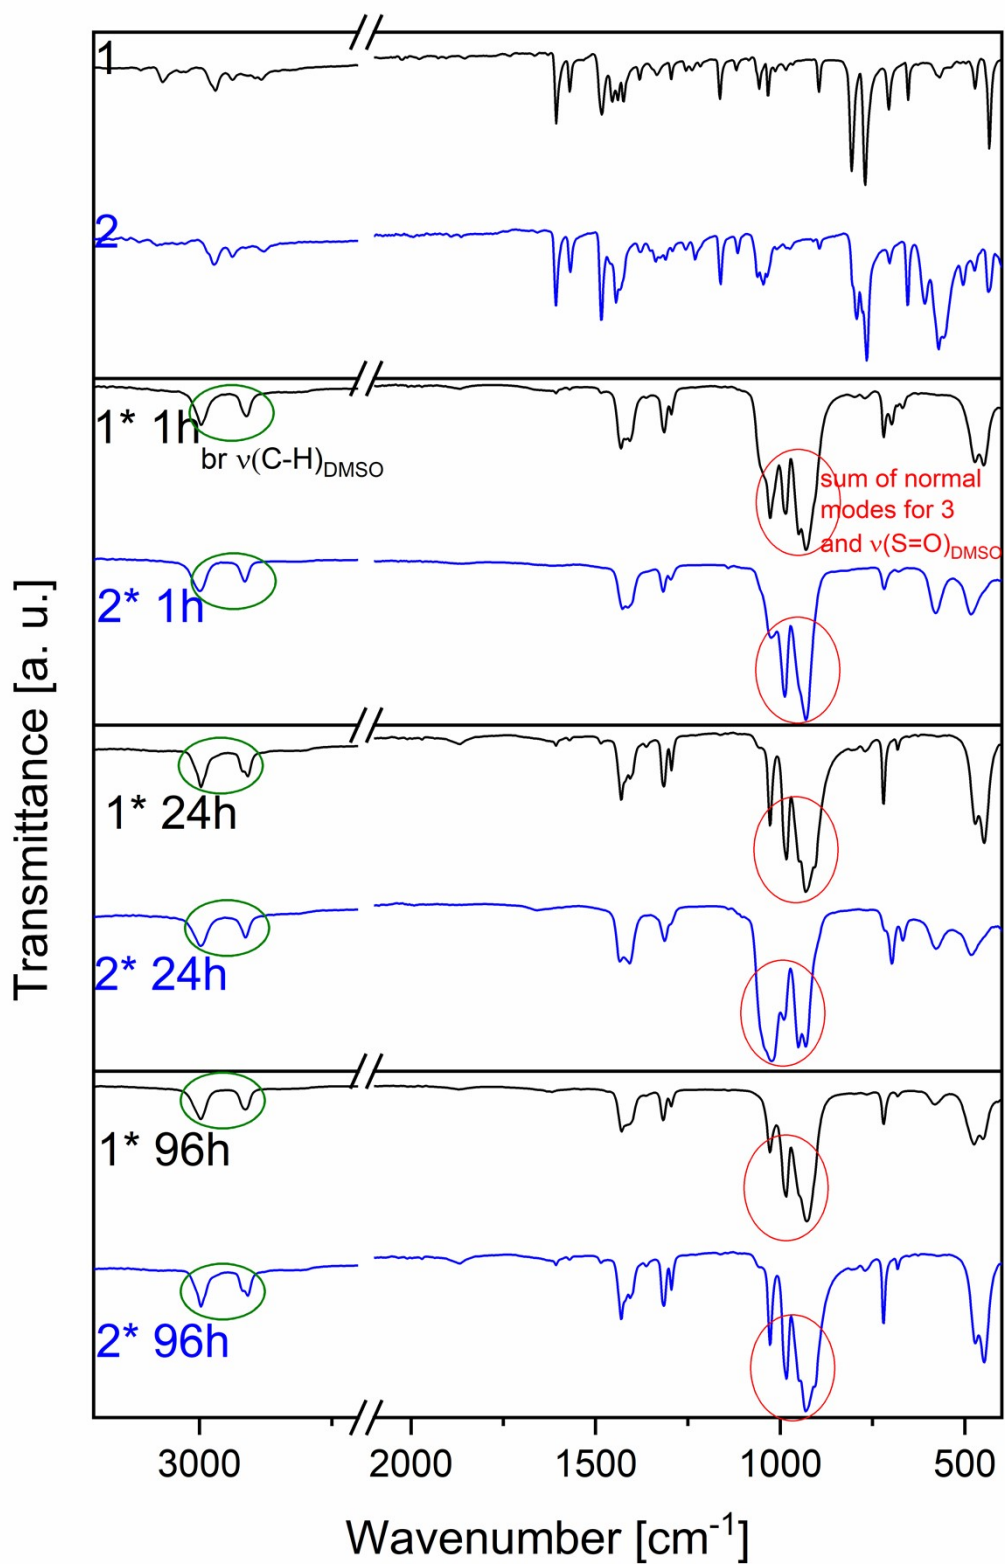

Fig. S3. The FT-IR spectra for complexes 1-2 in MIR spectral region; \*-complex in DMSO solution.

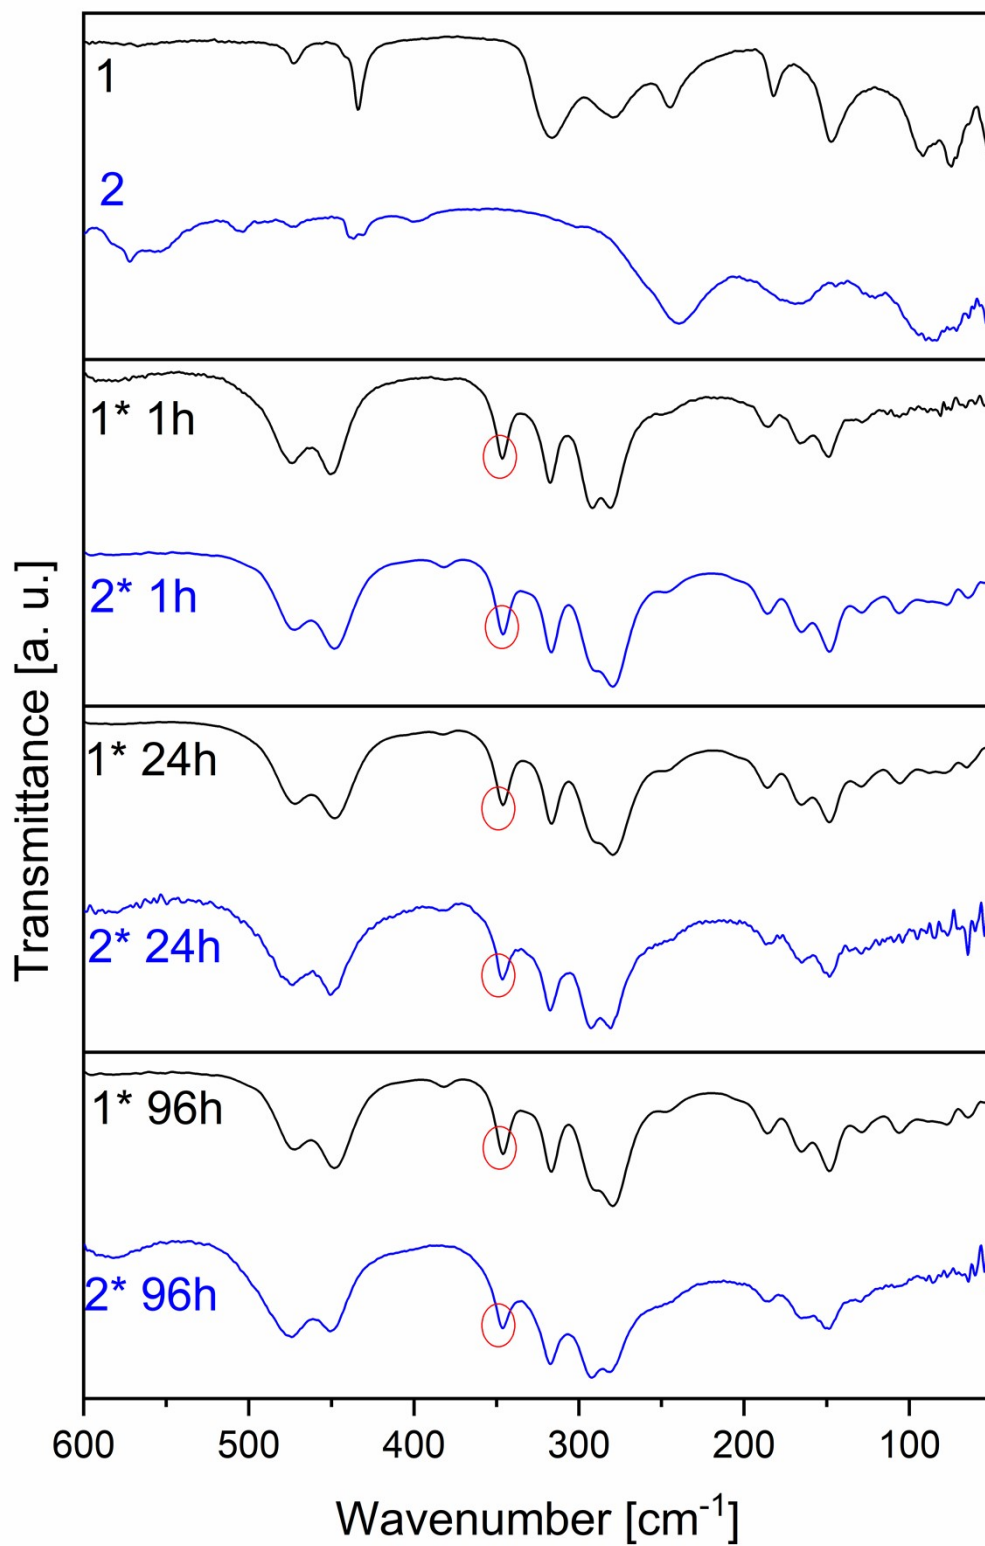

Fig. S4. The FT-IR spectra for complexes 1-2 in FIR spectral region; \*-complex in DMSO solution.



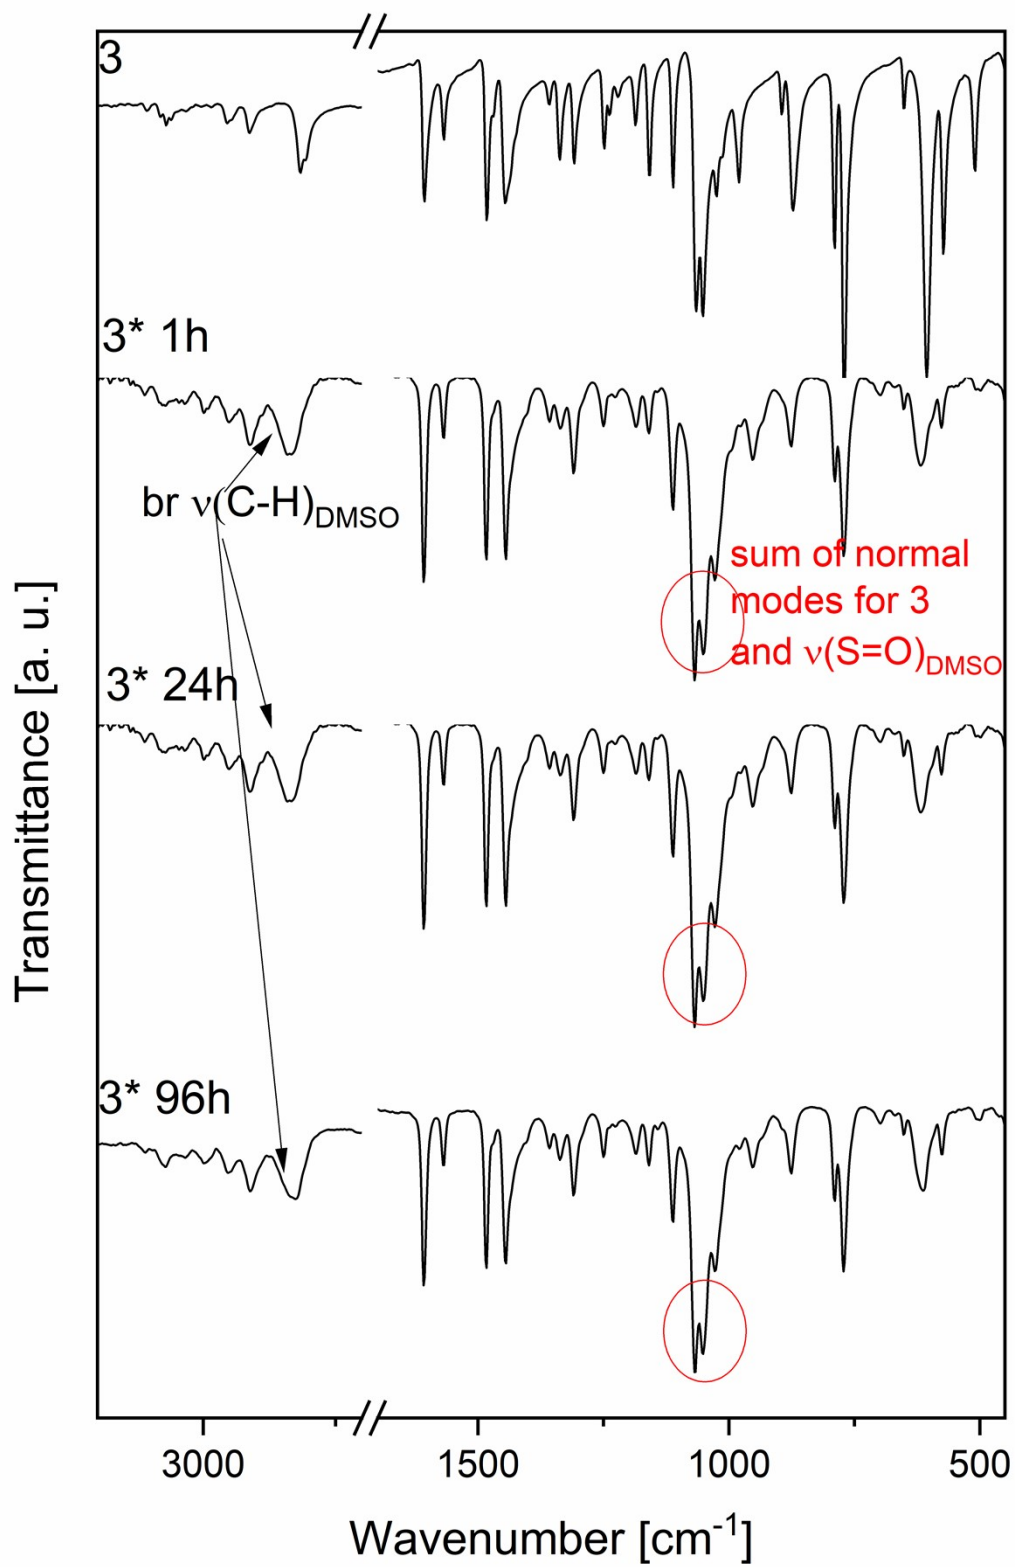

Fig. S5. The FT-IR spectra for complex **3** in MIR spectral region; \*-complex in DMSO solution.

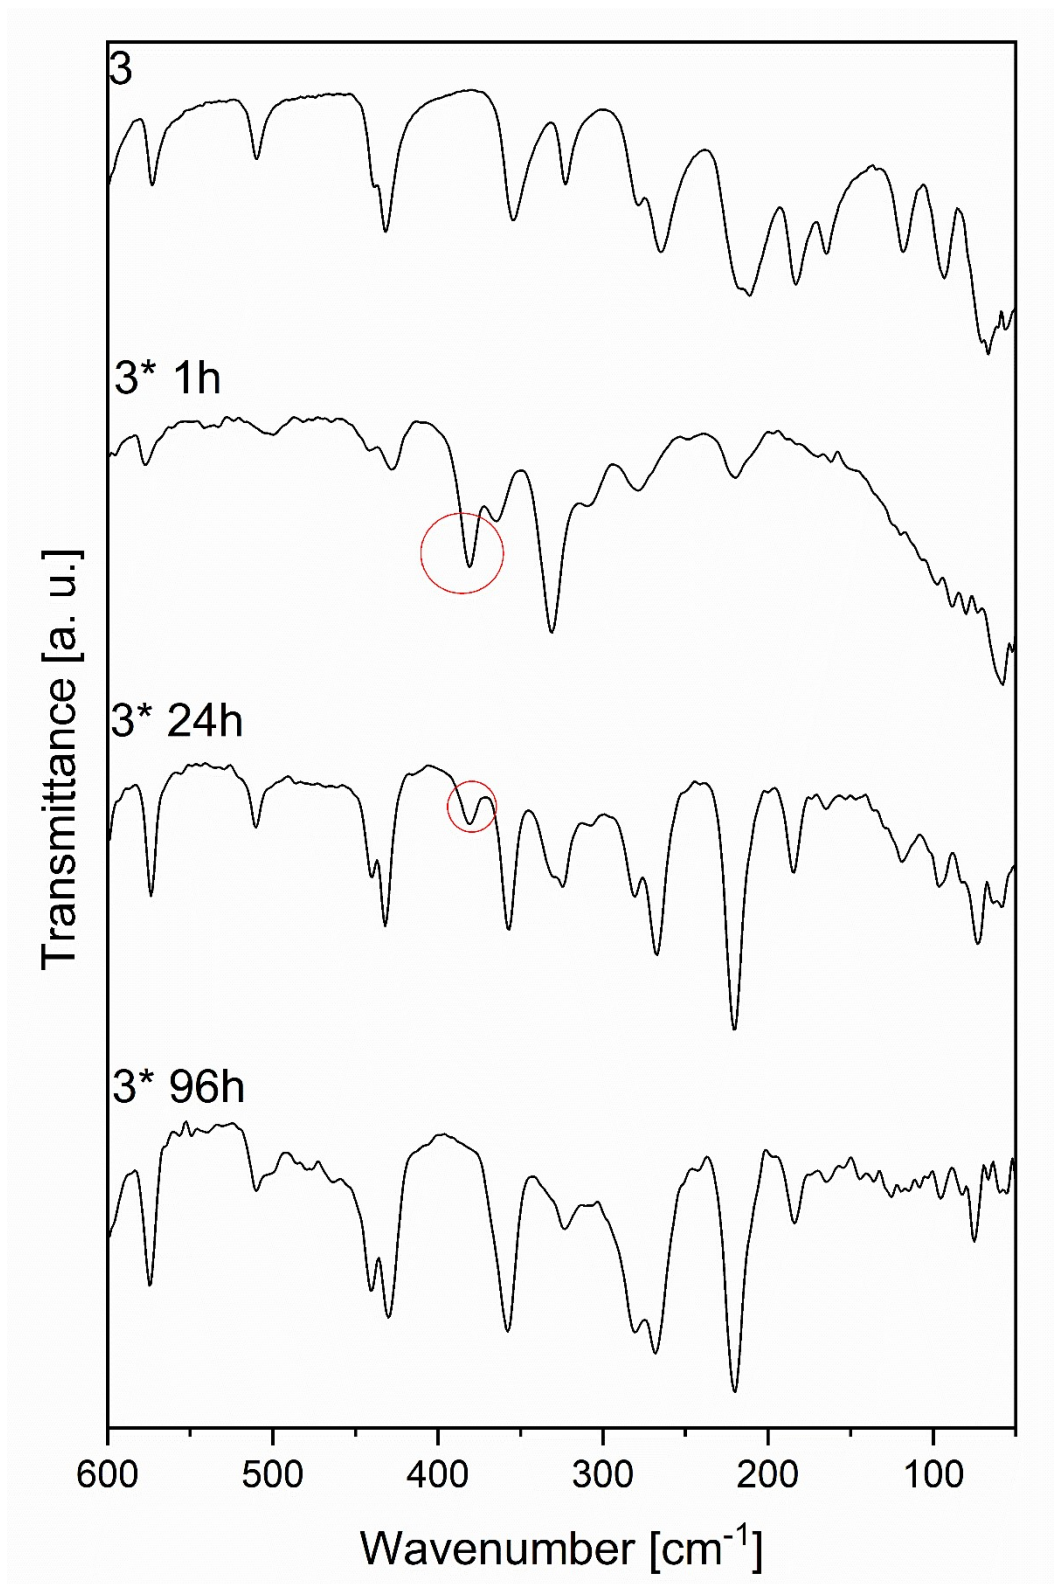

**Fig. S6.** The FT-IR spectra for complex **3** in FIR spectral region; \*-complex in DMSO solution.



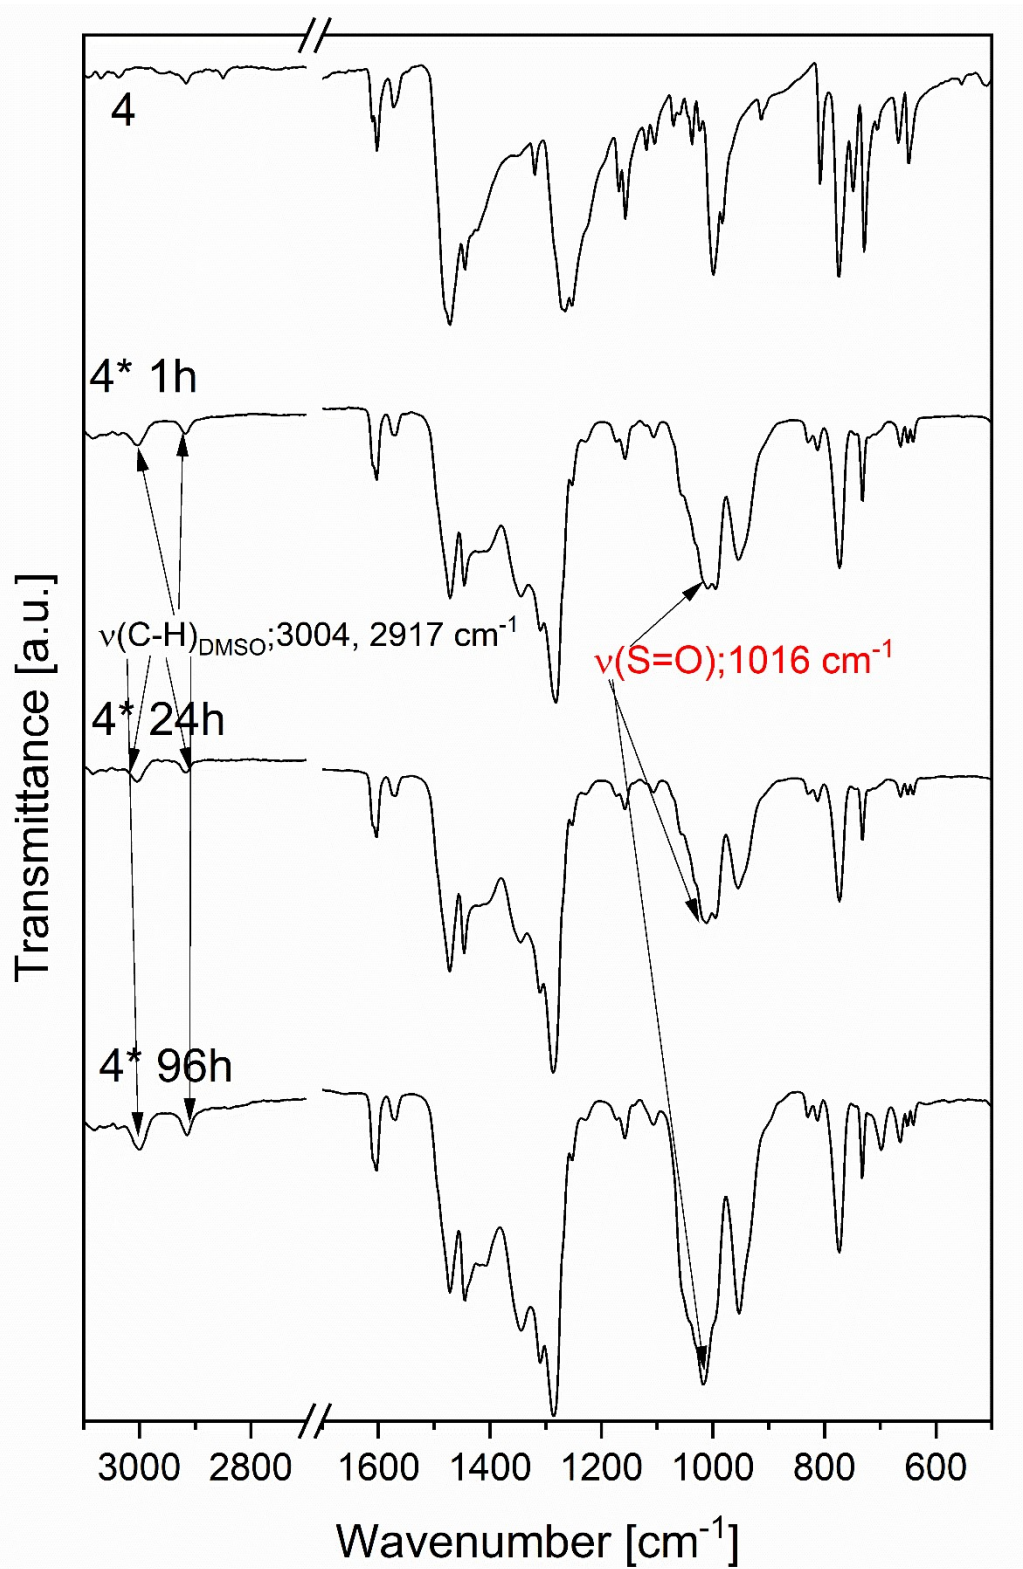

Fig. S7. The FT-IR spectra for complex 4 in MIR spectral region; \*-complex in DMSO solution.

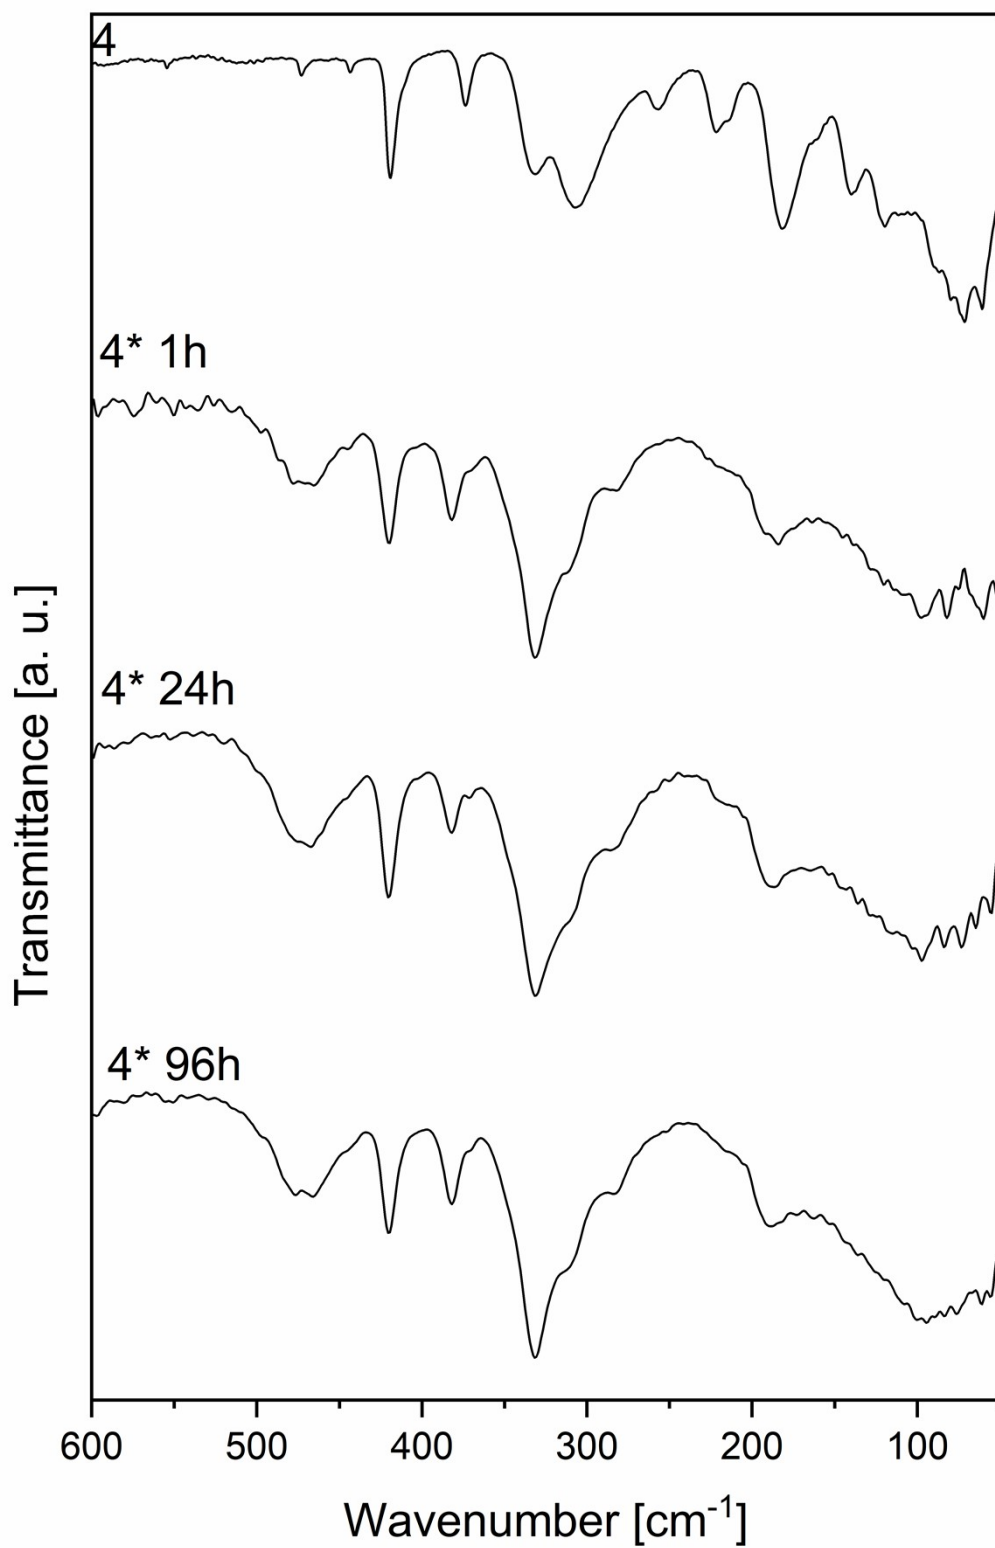

**Fig. S8.** The FT-IR spectra for complex 4 in FIR spectral region; \*-complex in DMSO solution.

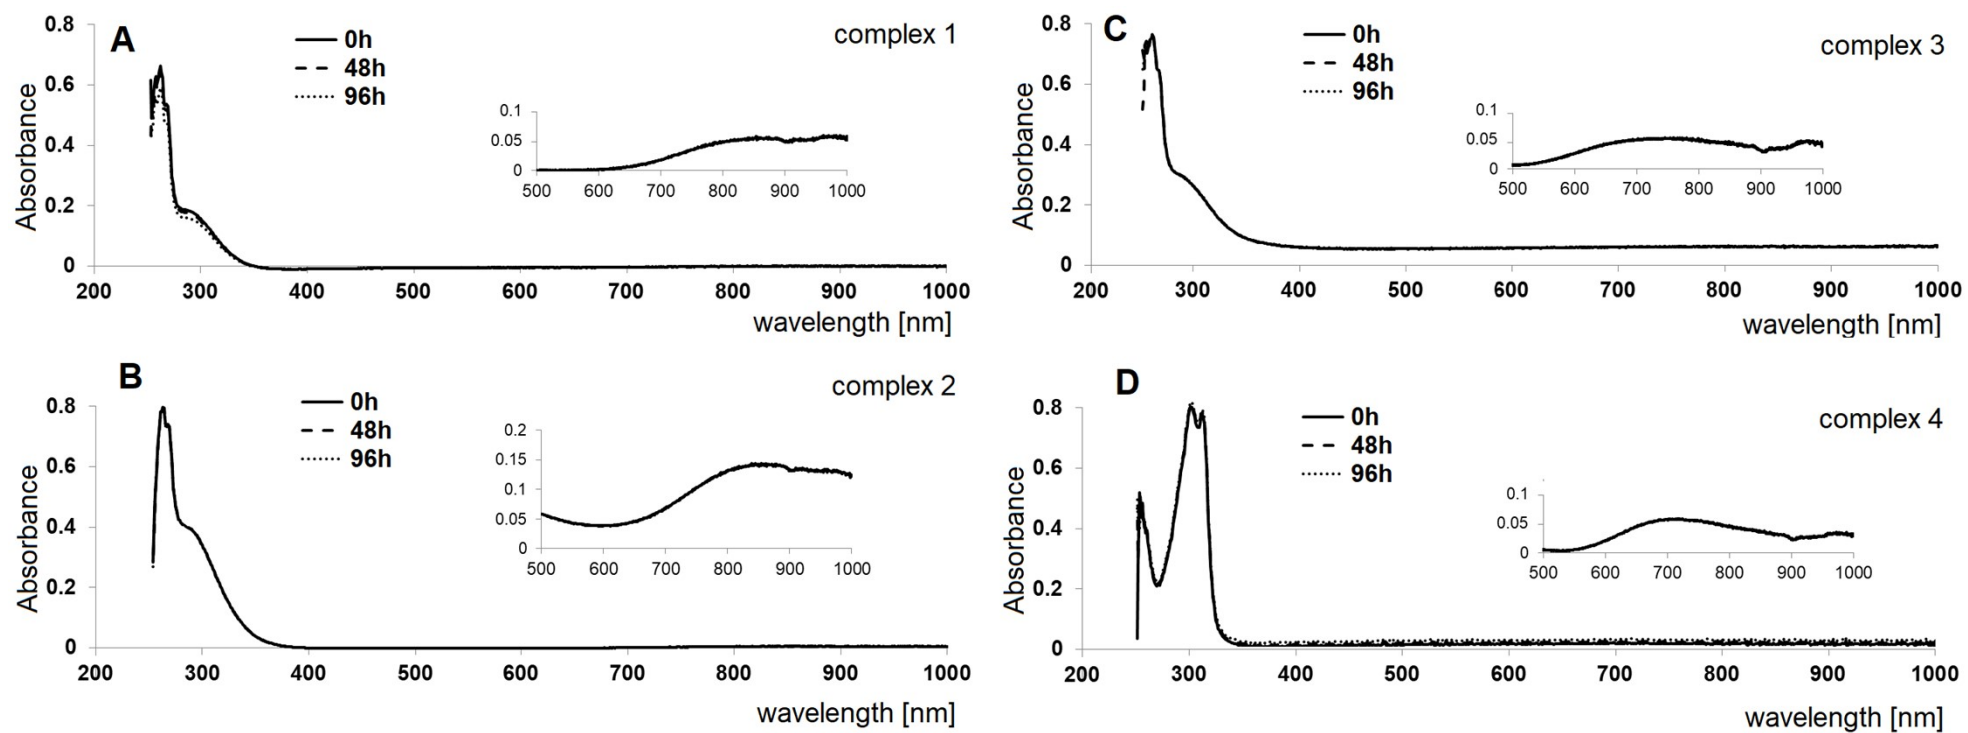

**Fig. S9.** UV-Vis spectra with inserted of d-d transition of **1-4** in DMSO/H<sub>2</sub>O (9:1, v/v).

### Complex 1

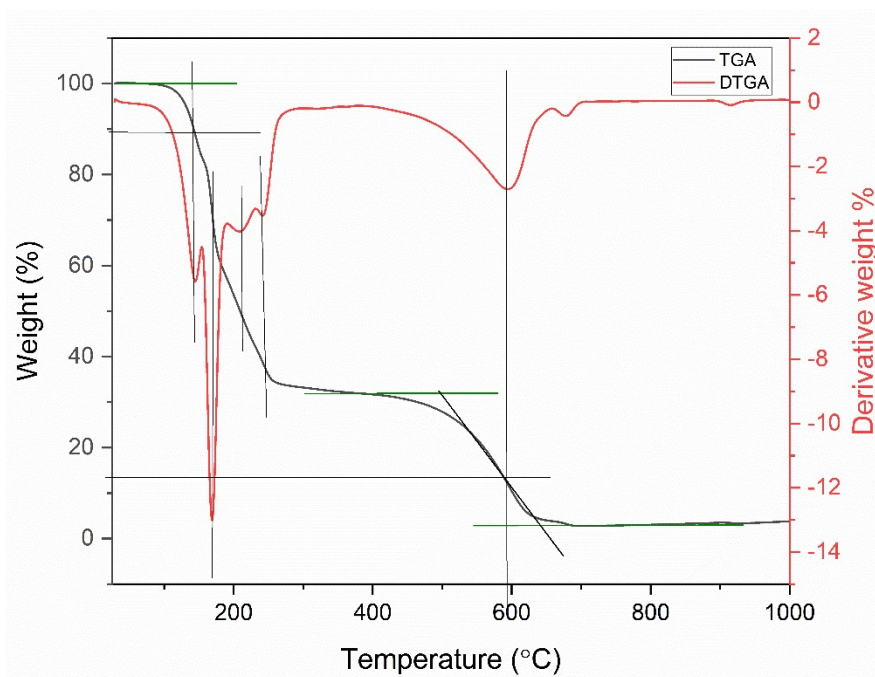

### Complex 2

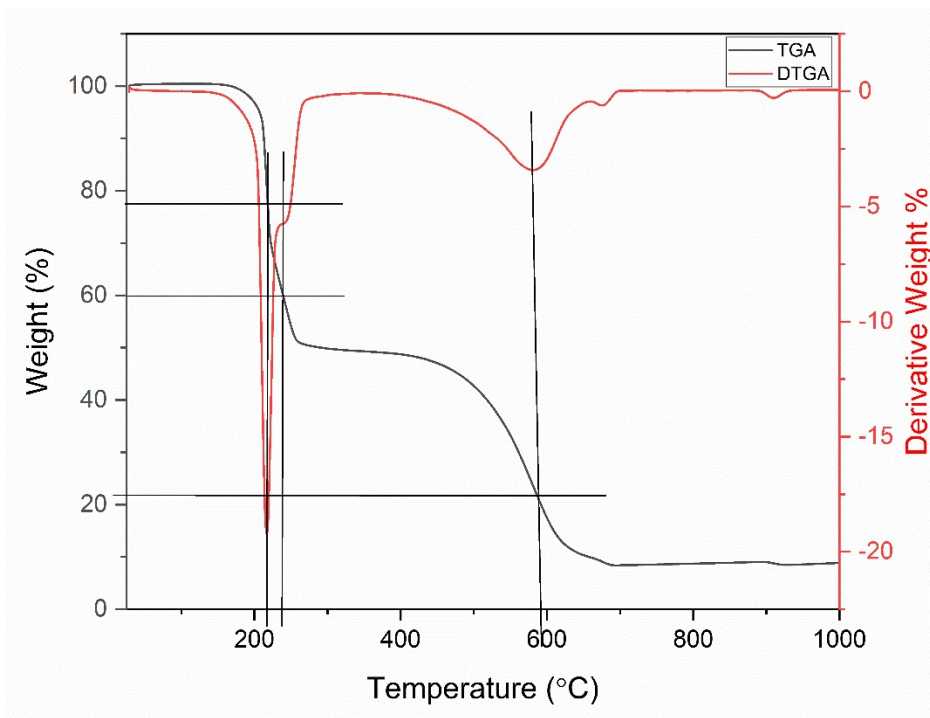



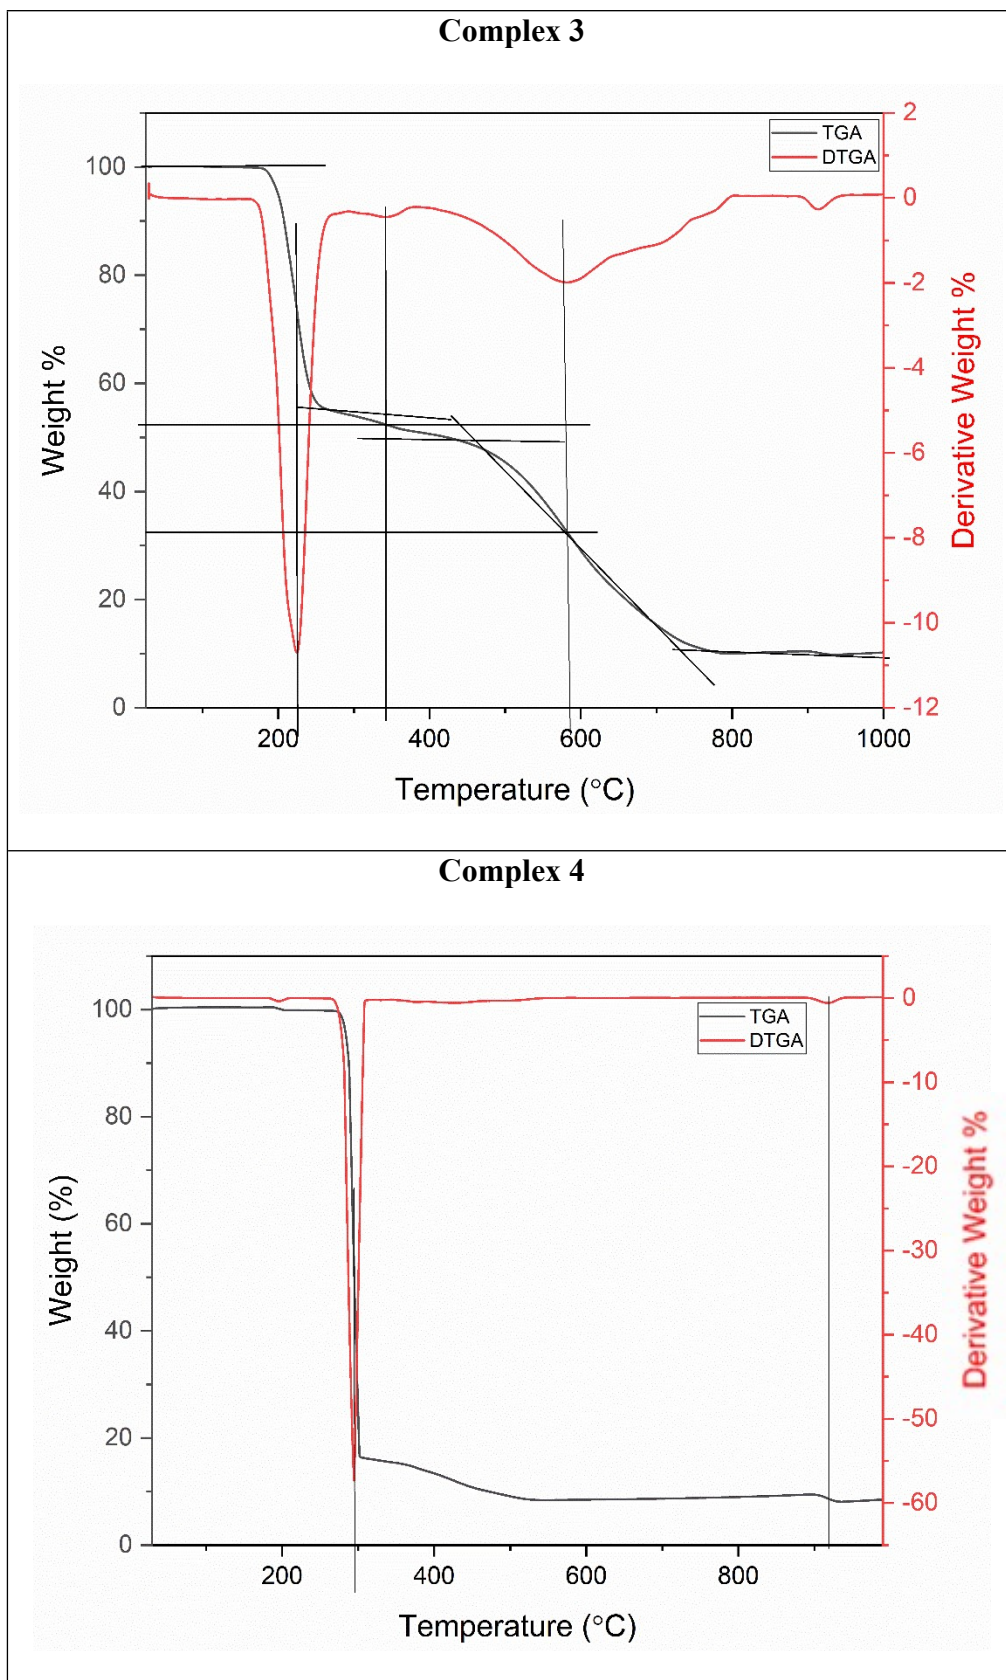

**Fig. S10.** Thermogravimetric, TG (black) and differential thermal analysis(DTG, red) curves of complexes 1-4.

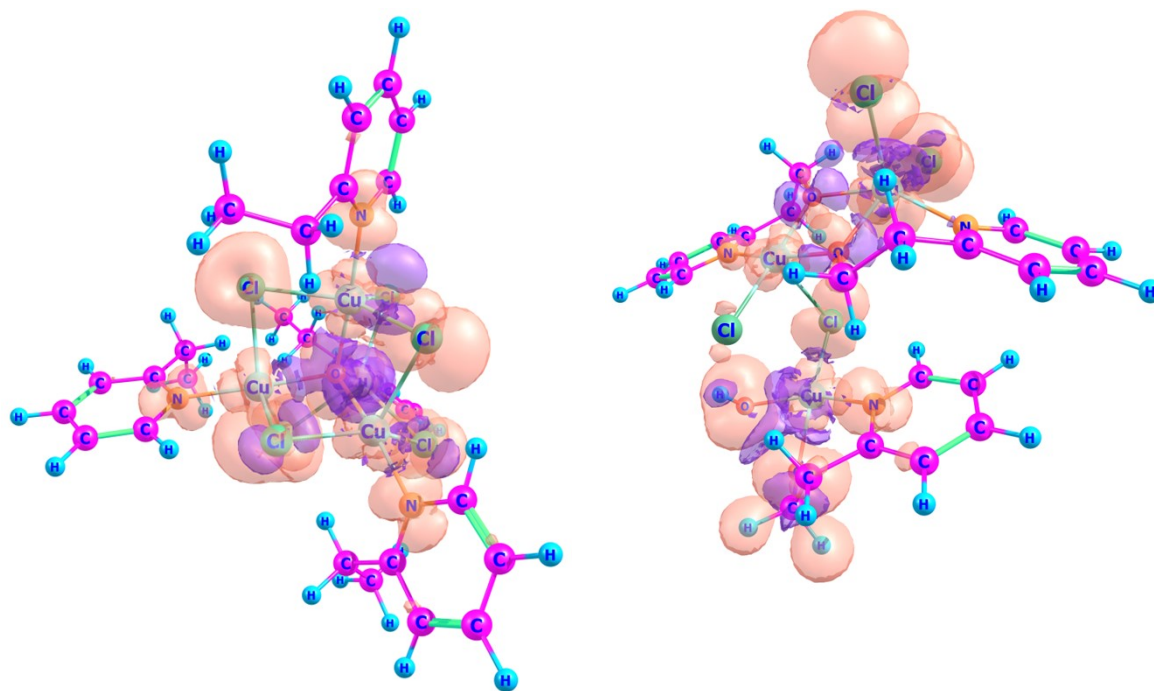

**Fig. S11.** Spin density isosurfaces (0.0075 a. u.) for high spin states of the 2–3 compounds, respectively (calculated with the hybrid B3LYP-D3 functional).



**Table S1.** Crystal data and structure refinement for 1-4.

|                                                 | 1                                                                                                                        | 2                                                                               | 3                                                                                                                      | 4                                                                             |
|-------------------------------------------------|--------------------------------------------------------------------------------------------------------------------------|---------------------------------------------------------------------------------|------------------------------------------------------------------------------------------------------------------------|-------------------------------------------------------------------------------|
| Empirical formula                               | C <sub>14</sub> H <sub>18</sub> Cl <sub>2</sub> N <sub>2</sub> Cu                                                        | C <sub>28</sub> H <sub>36</sub> Cl <sub>6</sub> N <sub>4</sub> OCu <sub>4</sub> | C <sub>14</sub> H <sub>16</sub> Cl <sub>2</sub> N <sub>2</sub> O <sub>2</sub> Cu <sub>2</sub>                          | C <sub>12</sub> H <sub>20</sub> N <sub>2</sub> O <sub>6</sub> Cu              |
| Formula weight                                  | 348.74                                                                                                                   | 911.47                                                                          | 442.27                                                                                                                 | 351.84                                                                        |
| Temperature [K]                                 | 293.0(2)                                                                                                                 | 293.0(2)                                                                        | 293.0(2)                                                                                                               | 293.0(2)                                                                      |
| Wavelength [Å]                                  | 0.71073                                                                                                                  | 0.71073                                                                         | 0.71073                                                                                                                | 0.71073                                                                       |
| Crystal system                                  | triclinic                                                                                                                | monoclinic                                                                      | triclinic                                                                                                              | monoclinic                                                                    |
| Space group                                     | $P\bar{1}$                                                                                                               | $P2_1/n$                                                                        | $P\bar{1}$                                                                                                             | $C2/m$                                                                        |
| Unit cell dimensions [Å, °]                     | a = 7.4891(4)<br>b = 7.5179(5)<br>c = 8.3461(4)<br>$\alpha$ = 97.096(5)<br>$\beta$ = 113.966(5)<br>$\gamma$ = 108.729(5) | a = 16.7450(7)<br>b = 11.9340(6)<br>c = 18.8133(9)<br><br>$\beta$ = 103.620(4)  | a = 6.1899(3)<br>b = 8.0094(5)<br>c = 8.5356(4)<br>$\alpha$ = 89.741(5)<br>$\beta$ = 79.214(4)<br>$\gamma$ = 70.029(6) | a = 13.5721(14)<br>b = 7.1790(5)<br>c = 8.2686(6)<br><br>$\beta$ = 110.398(7) |
| Volume [Å <sup>3</sup> ]                        | 388.75(4)                                                                                                                | 3653.8(3)                                                                       | 389.89(4)                                                                                                              | 755.12(11)                                                                    |
| Z                                               | 1                                                                                                                        | 4                                                                               | 1                                                                                                                      | 2                                                                             |
| Density (calculated) [Mg/m <sup>3</sup> ]       | 1.490                                                                                                                    | 1.657                                                                           | 3.076                                                                                                                  | 1.547                                                                         |
| Absorption coefficient [mm <sup>-1</sup> ]      | 1.736                                                                                                                    | 2.764                                                                           | 1.884                                                                                                                  | 1.474                                                                         |
| $F(000)$                                        | 179                                                                                                                      | 1832                                                                            |                                                                                                                        | 366                                                                           |
| Crystal size [mm]                               | 0.24 x 0.16 x 0.09                                                                                                       | 0.12 x 0.08 x 0.06                                                              | 0.25 x 0.22 x 0.18                                                                                                     | 0.30 x 0.25 x 0.16                                                            |
| $\theta$ range for data collection [°]          | 3.44 to 25.05                                                                                                            | 3.39 to 25.05                                                                   | 3.53 to 25.05                                                                                                          | 3.36 to 25.05                                                                 |
| Index ranges                                    | -8 ≤ $h$ ≤ 8<br>-8 ≤ $k$ ≤ 8<br>-9 ≤ $l$ ≤ 9                                                                             | -22 ≤ $h$ ≤ 21<br>-16 ≤ $k$ ≤ 13<br>-17 ≤ $l$ ≤ 25                              | -8 ≤ $h$ ≤ 7<br>-10 ≤ $k$ ≤ 9<br>-11 ≤ $l$ ≤ 10                                                                        | -16 ≤ $h$ ≤ 13<br>-8 ≤ $k$ ≤ 8<br>-9 ≤ $l$ ≤ 9                                |
| Reflections collected                           | 6599                                                                                                                     | 25795                                                                           | 7390                                                                                                                   | 3292                                                                          |
| Independent reflections                         | 3430 ( $R_{int}$ = 0.0397)                                                                                               | 8883 ( $R_{int}$ = 0.0395)                                                      | 1922 ( $R_{int}$ = 0.0403)                                                                                             | 728 ( $R_{int}$ = 0.0253)                                                     |
| Completeness to 2 $\theta$ [%]                  | 99.6                                                                                                                     | 99.6                                                                            | 99.9                                                                                                                   | 99.6                                                                          |
| Max. and min. transmission                      | 1.00 and 0.796                                                                                                           | 1.00 and 0.649                                                                  | 1.00 and 0.360                                                                                                         | 1.00 and 0.078                                                                |
| Data / restraints / parameters                  | 1373 / 0 / 89                                                                                                            | 8883 / 0 / 411                                                                  | 1922 / 0 / 100                                                                                                         | 728 / 0 / 66                                                                  |
| Goodness-of-fit on $F^2$                        | 1.074                                                                                                                    | 1.011                                                                           | 1.033                                                                                                                  | 1.113                                                                         |
| Final R indices [ $I > 2\sigma(I)$ ]            | $R_1$ = 0.0274<br>$wR_2$ = 0.0635                                                                                        | $R_1$ = 0.0392<br>$wR_2$ = 0.0857                                               | $R_1$ = 0.0309<br>$wR_2$ = 0.0641                                                                                      | $R_1$ = 0.0283<br>$wR_2$ = 0.0723                                             |
| R indices (all data)                            | $R_1$ = 0.0328<br>$wR_2$ = 0.0658                                                                                        | $R_1$ = 0.0793<br>$wR_2$ = 0.0717                                               | $R_1$ = 0.0438<br>$wR_2$ = 0.0716                                                                                      | $R_1$ = 0.0291<br>$wR_2$ = 0.0717                                             |
| Largest diff. peak and hole [eÅ <sup>-3</sup> ] | 0.388 and -0.408                                                                                                         | 0.589 and -0.394                                                                | 0.328 and -0.578                                                                                                       | 0.381 and -0.275                                                              |

**Table S2.** Selected bond lengths (Å) and angles (deg) for 2.

| Bond lengths [Å] |            | Bond angles [°]   |            |
|------------------|------------|-------------------|------------|
| Cu(1)-N(1)       | 1.988(3)   | N(1)-Cu(1)-Cl(1)  | 92.51(8)   |
| Cu(1)-Cl(1)      | 2.3320(9)  | N(1)-Cu(1)-Cl(3)  | 103.12(9)  |
| Cu(1)-Cl(3)      | 2.4366(10) | N(1)-Cu(1)-Cl(6)  | 99.47(8)   |
| Cu(1)-Cl(6)      | 2.5068(9)  | N(1)-Cu(1)-O(1)   | 174.07(11) |
| Cu(1)-O(1)       | 1.9086(19) | Cl(1)-Cu(1)-Cl(3) | 126.99(4)  |
| Cu(2)-N(2)       | 1.972(2)   | Cl(1)-Cu(1)-Cl(6) | 127.84(4)  |
| Cu(2)-Cl(1)      | 2.5136(9)  | Cl(3)-Cu(1)-Cl(6) | 99.36(4)   |
| Cu(2)-Cl(2)      | 2.3199(9)  | O(1)-Cu(1)-Cl(1)  | 84.33(6)   |
| Cu(2)-Cl(5)      | 2.5672(10) | O(1)-Cu(1)-Cl(3)  | 82.77(6)   |
| Cu(2)-O(1)       | 1.8853(18) | O(1)-Cu(1)-Cl(6)  | 78.70(6)   |
| Cu(3)-N(3)       | 1.970(3)   | N(2)-Cu(2)-Cl(1)  | 95.26(8)   |
| Cu(3)-Cl(2)      | 2.6850(9)  | N(2)-Cu(2)-Cl(2)  | 94.47(8)   |
| Cu(3)-Cl(3)      | 2.3817(10) | N(2)-Cu(2)-Cl(5)  | 99.97(9)   |
| Cu(3)-Cl(4)      | 2.3385(10) | N(2)-Cu(2)-O(1)   | 174.81(10) |

|             |            |                   |            |
|-------------|------------|-------------------|------------|
| Cu(3)-O(1)  | 1.8994(19) | Cl(1)-Cu(2)-Cl(2) | 147.54(4)  |
| Cu(4)-N(4)  | 1.973(3)   | Cl(1)-Cu(2)-Cl(5) | 91.93(3)   |
| Cu(4)-Cl(4) | 2.6099(9)  | Cl(2)-Cu(2)-Cl(5) | 116.69(4)  |
| Cu(4)-Cl(5) | 2.3400(8)  | O(1)-Cu(2)-Cl(1)  | 79.85(6)   |
| Cu(4)-Cl(6) | 2.3848(9)  | O(1)-Cu(2)-Cl(2)  | 88.85(6)   |
| Cu(4)-O(1)  | 1.899(2)   | O(1)-Cu(2)-Cl(5)  | 82.02(7)   |
|             |            | N(3)-Cu(3)-Cl(2)  | 103.90(8)  |
|             |            | N(3)-Cu(3)-Cl(3)  | 90.11(8)   |
|             |            | N(3)-Cu(3)-Cl(4)  | 95.93(8)   |
|             |            | N(3)-Cu(3)-O(1)   | 174.54(10) |
|             |            | Cl(2)-Cu(3)-Cl(3) | 106.16(4)  |
|             |            | Cl(2)-Cu(3)-Cl(4) | 95.54(4)   |
|             |            | Cl(3)-Cu(3)-Cl(4) | 155.37(4)  |
|             |            | O(1)-Cu(3)-Cl(2)  | 78.37(6)   |
|             |            | O(1)-Cu(3)-Cl(3)  | 84.48(6)   |
|             |            | O(1)-Cu(3)-Cl(4)  | 88.74(7)   |
|             |            | N(4)-Cu(4)-Cl(4)  | 100.54(9)  |
|             |            | N(4)-Cu(4)-Cl(5)  | 92.64(8)   |
|             |            | N(4)-Cu(4)-Cl(6)  | 96.24(8)   |
|             |            | N(4)-Cu(4)-O(1)   | 177.88(10) |
|             |            | Cl(4)-Cu(4)-Cl(5) | 106.69(3)  |
|             |            | Cl(4)-Cu(4)-Cl(6) | 98.58(3)   |
|             |            | Cl(5)-Cu(4)-Cl(6) | 151.16(4)  |
|             |            | O(1)-Cu(4)-Cl(4)  | 81.08(6)   |
|             |            | O(1)-Cu(4)-Cl(4)  | 81.08(6)   |
|             |            | O(1)-Cu(4)-Cl(5)  | 88.19(6)   |
|             |            | O(1)-Cu(4)-Cl(6)  | 82.12(6)   |
|             |            | Cu(1)-O(1)-Cu(2)  | 109.66(9)  |
|             |            | Cu(1)-O(1)-Cu(3)  | 108.01(9)  |
|             |            | Cu(1)-O(1)-Cu(4)  | 105.97(9)  |
|             |            | Cu(2)-O(1)-Cu(3)  | 113.99(10) |
|             |            | Cu(2)-O(1)-Cu(4)  | 110.99(10) |
|             |            | Cu(3)-O(1)-Cu(4)  | 107.86(9)  |
|             |            | Cu(1)-Cl(1)-Cu(2) | 79.50(3)   |
|             |            | Cu(1)-Cl(3)-Cu(3) | 79.49(3)   |
|             |            | Cu(1)-Cl(6)-Cu(4) | 76.81(3)   |
|             |            | Cu(2)-Cl(2)-Cu(3) | 78.34(3)   |
|             |            | Cu(2)-Cl(5)-Cu(4) | 78.76(3)   |
|             |            | Cu(3)-Cl(4)-Cu(4) | 76.48(3)   |

**Table S3.** The experimental and calculated vibrational frequencies of copper(II) complexes. B3LYP-D3/def2-TZVP level of theory was applied, the calculated frequencies are left unscaled; only selected bands are discussed.

| No | Complex 1 |        |           | Complex 2 |         |           | Complex 3 |        |           | Complex 4   |        | Assignments |                                                                                                                                                                                                                                                                                                                                                                                                                                                                                                                                                                                                                                                                                                                                                   |
|----|-----------|--------|-----------|-----------|---------|-----------|-----------|--------|-----------|-------------|--------|-------------|---------------------------------------------------------------------------------------------------------------------------------------------------------------------------------------------------------------------------------------------------------------------------------------------------------------------------------------------------------------------------------------------------------------------------------------------------------------------------------------------------------------------------------------------------------------------------------------------------------------------------------------------------------------------------------------------------------------------------------------------------|
|    | expl      |        | calcd     | expl      |         | calcd     | expl      |        | calcd     | expl        |        |             | calcd                                                                                                                                                                                                                                                                                                                                                                                                                                                                                                                                                                                                                                                                                                                                             |
|    | IR        | Raman  |           | IR        | Raman   |           | IR        | Raman  |           | IR          | Raman  |             |                                                                                                                                                                                                                                                                                                                                                                                                                                                                                                                                                                                                                                                                                                                                                   |
| 1  |           |        |           | 3452 m    |         |           |           |        |           |             |        |             | H-bond intermolecular interaction<br>$\nu(\text{C-H})_{\text{arom}}$<br>$\nu_{\text{as}}(\text{C-H})_{\text{alif}}$<br>$\nu_{\text{as}}(\text{C-H})_{\text{alif}}-\text{CH}_2-$<br>$\nu_{\text{s}}(\text{C-H})_{\text{alif}}$<br>$\nu_{\text{s}}(\text{C-H})_{\text{alif}}-\text{CH}_2-$<br>overtone 1337<br>overtone<br>overtone<br>$\nu(\text{C}=\text{C})$<br>$\nu(\text{C}-\text{C})$<br>$\nu(\text{C}=\text{N})$<br>$\delta(\text{C-H})$ scissoring<br>$\delta_{\text{sym}}(\text{C}-\text{CH}_3)$ umbrella<br>$\delta\text{C-H}$ wagging<br>$\delta\text{C-H}$ twisting<br>$\delta\text{Rpy}$<br>$\delta\text{C-H}$ (in plane)<br>$\delta\text{C-H}$ (in plane)<br>$\nu(\text{C}-\text{C})_{\text{in ethyl group}}+\text{defR}_{\text{py}}$ |
| 2  |           |        |           | 3335 m    |         |           |           |        |           |             |        |             |                                                                                                                                                                                                                                                                                                                                                                                                                                                                                                                                                                                                                                                                                                                                                   |
| 3  | 3070 m    | 3070 s | 3217-3180 | 3079 w    | 3080 s  | 3219-3176 | 3070 m    | 3080 m | 3220-3180 | 3116-3037 w | 3085 m | 3206–3171   |                                                                                                                                                                                                                                                                                                                                                                                                                                                                                                                                                                                                                                                                                                                                                   |
| 4  | 2970 m    | 2970 m | 3104      | 2972 m    |         | 3099      | 2955 m    | 2956 m | 3065      |             |        | 2880        |                                                                                                                                                                                                                                                                                                                                                                                                                                                                                                                                                                                                                                                                                                                                                   |
| 5  | 2937 m    | 2938 m | 3040      | 2937 m    | 2938 m  | 3068      | 2914 m    | 2914 m | 3096      |             |        |             |                                                                                                                                                                                                                                                                                                                                                                                                                                                                                                                                                                                                                                                                                                                                                   |
| 6  | 2883 m    | 2883 m | 3034      | 2878 m    | 2901 m  | 3040      | 2817      | 2820 m | 3010      | 2916 m      |        |             |                                                                                                                                                                                                                                                                                                                                                                                                                                                                                                                                                                                                                                                                                                                                                   |
| 7  | ov        | ov     | 3010      | ov        | ov      | 3041      | ov        | ov     | 3046      | 2850        |        | 2885        |                                                                                                                                                                                                                                                                                                                                                                                                                                                                                                                                                                                                                                                                                                                                                   |
|    |           |        |           |           |         |           | 2680 w    |        |           |             |        |             |                                                                                                                                                                                                                                                                                                                                                                                                                                                                                                                                                                                                                                                                                                                                                   |
|    | 1855 w    |        |           | 1864 w    |         |           |           |        |           |             |        |             |                                                                                                                                                                                                                                                                                                                                                                                                                                                                                                                                                                                                                                                                                                                                                   |
|    | 1732 w    |        |           | 1728 w    |         |           |           |        |           |             |        |             |                                                                                                                                                                                                                                                                                                                                                                                                                                                                                                                                                                                                                                                                                                                                                   |
| 8  | 1607 s    | 1606 s | 1652      | 1608 s    | 1632 w  | 1654      | 1607 s    | 1607 m | 1652      | 1602 m      | 1601   | 1647        |                                                                                                                                                                                                                                                                                                                                                                                                                                                                                                                                                                                                                                                                                                                                                   |
| 9  | 1569 m    | 1569 m | 1618      | 1568 m    | 1568 w  | 1614      | 1568 m    | 1567 m | 1614      | 1573        | 1568   | 1611        |                                                                                                                                                                                                                                                                                                                                                                                                                                                                                                                                                                                                                                                                                                                                                   |
| 10 | 1484 s    | 1459 w | 1528      | 1484 s    | 1467 w  | 1532      | 1483 s    | 1468 m | 1526      | 1472        | 1497   | 1515        |                                                                                                                                                                                                                                                                                                                                                                                                                                                                                                                                                                                                                                                                                                                                                   |
| 11 | 1440 m    | 1425 w | 1511      | 1444 s    | 1443 w  | 1515      | 1446 m    | 1446 w | 1506      | 1445 sh     | vw     | 1478        |                                                                                                                                                                                                                                                                                                                                                                                                                                                                                                                                                                                                                                                                                                                                                   |
|    | 1425 m    |        | 1506      |           |         | 1508      |           |        |           |             |        |             |                                                                                                                                                                                                                                                                                                                                                                                                                                                                                                                                                                                                                                                                                                                                                   |
|    |           |        | 1498      |           |         | 1493      |           |        |           |             |        |             |                                                                                                                                                                                                                                                                                                                                                                                                                                                                                                                                                                                                                                                                                                                                                   |
| 12 | 1380 m    | 1364 w | 1423      | 1378 w    |         | 1423      | -         | -      | -         |             |        | -           |                                                                                                                                                                                                                                                                                                                                                                                                                                                                                                                                                                                                                                                                                                                                                   |
| 13 | 1336      | 1348 w | 1396      | 1337 w    | 1336 vw | 1382      | 1337 m    | 1342 m | 1383      |             |        | 1381        |                                                                                                                                                                                                                                                                                                                                                                                                                                                                                                                                                                                                                                                                                                                                                   |
|    | br, w     |        |           |           |         |           |           |        |           |             |        |             |                                                                                                                                                                                                                                                                                                                                                                                                                                                                                                                                                                                                                                                                                                                                                   |
| 14 | 1295 m    | 1295 w | 1328      | 1310 w    |         | 1335      | 1308 m    | 1308 m | 1347      | 1320 w      | 1323 s | 1315        |                                                                                                                                                                                                                                                                                                                                                                                                                                                                                                                                                                                                                                                                                                                                                   |
| 15 | 1255 w    | 1217 s | 1298      | 1230 w    | 1233 m  | 1301      | 1248 m    | 1226 m | 1296      | 1265 s      | 1263 m | 1299        |                                                                                                                                                                                                                                                                                                                                                                                                                                                                                                                                                                                                                                                                                                                                                   |
|    | 1238 w    |        |           |           |         |           | 1237 sh   |        |           |             |        |             |                                                                                                                                                                                                                                                                                                                                                                                                                                                                                                                                                                                                                                                                                                                                                   |
| 16 | 1163 m    | 1165 m | 1195      | 1161 m    | 1163 w  | 1197      | 1186 m    | 1184   | 1211      |             |        |             |                                                                                                                                                                                                                                                                                                                                                                                                                                                                                                                                                                                                                                                                                                                                                   |
|    |           |        |           |           |         |           | 1158 s    | 1157 m | 1194      | 1157 m      | 1172 m | 1186        |                                                                                                                                                                                                                                                                                                                                                                                                                                                                                                                                                                                                                                                                                                                                                   |
| 17 | 1117 w    |        | 1146      | 1115 m    | 1117 w  | 1147      | 1111 s    | 1116 w | 1142      | 1104 w      | 1107 m |             |                                                                                                                                                                                                                                                                                                                                                                                                                                                                                                                                                                                                                                                                                                                                                   |
| 18 | 1057 m    | 1056 s | 1060      | 1061sh    | 1063 s  | 1071      | 1064 s    | 1053 s | 1059      | -           | -      |             |                                                                                                                                                                                                                                                                                                                                                                                                                                                                                                                                                                                                                                                                                                                                                   |

|    |        |         |      |        |        |      |        |        |      |        |        |      |                                                 |
|----|--------|---------|------|--------|--------|------|--------|--------|------|--------|--------|------|-------------------------------------------------|
| 19 | -      |         |      | -      |        |      |        | 1081 s | 1099 | ov     | 1058 m | 1122 | ν(C-O)<br>Sym ring breathing<br>(star of David) |
| 20 | 1033 m | 1031 vs | 1049 | 1045 m | 1031 s | 1050 | 1052 s | 1025 s | 1045 | 1038 m | 1038 s | 1044 |                                                 |
| 21 |        |         |      |        |        |      |        | 980 m  | 992  | 999 vs | 1004   | 998  | γC-H (out of plane)                             |
|    | 895 m  |         | 902  | 894 w  |        | 910  | 872 s  | 879 m  | 888  | 913 w  |        | 899  |                                                 |
|    | 806 vs |         | 794  | 793 s  | 781 s  | 783  | 789 s  | 785 m  | 785  | 807 m  | 813 m  |      |                                                 |
|    | 769 vs | 777 vs  | 775  | 765 vs | 740 m  | 779  | 770 vs | 757 m  | 776  |        |        | 778  |                                                 |
|    | 706 m  |         | 728  | 704 m  | 707 w  | 725  |        | 709 m  |      |        |        |      |                                                 |
| 22 | 654 s  | 650 s   | 666  | 655 s  | 655 w  | 671  | 651 m  | 648 w  | 667  |        |        | 675  | δ R <sub>pyet</sub>                             |
| 23 |        |         |      | 608 s  | 610 s  |      | 606 vs | 609 w  | 620  |        |        |      | τR <sub>pyet</sub>                              |
| 24 | 571 m  | 565 m   | 573  | 572 s  | 558 s  | 587  | 572 s  | 545 m  | 573  |        |        |      | Def R                                           |
| 25 |        |         |      | 505 m  | 507 w  | 523  | 510 m  | 505 w  | 516  |        |        |      | τR <sub>pyet</sub>                              |
|    | 472 m  |         | 492  | 474 w  |        | 493  |        |        |      |        |        |      | τR <sub>pyet</sub>                              |
|    | 434 s  | 435 s   | 442  | 437 m  |        | 443  | 432 s  | 412 vs | 434  | 419 m  |        | 429  | τR <sub>pyet</sub>                              |

**Table S4.** Mulliken populations computed at the B3LYP-D3 theory level of 2-3 (selected atoms).

| Compound 2 |         | Compound 3 |         |
|------------|---------|------------|---------|
| Cu:        | 0.5744  | Cu         | 0.5668  |
| Cu:        | 0.5833  | Cl1        | 0.1199  |
| Cu:        | -0.5857 | Cl1        | 0.0245  |
| Cu:        | 0.5786  | O          | 0.5705  |
| Cl:        | 0.1577  | Cu1        | 0.3237  |
| Cl:        | 0.1261  | Cl         | 0.1302  |
| Cl:        | -0.0414 | O1         | -0.0351 |
| Cl:        | -0.0972 | Cu1        | 0.1820  |
| Cl:        | 0.1353  | Cl         | 0.4037  |
| Cl:        | 0.1383  | O1         | -0.0538 |
| O          | 0.2933  |            |         |
